# Supplementary material
Source: publisher figshare collection journal article supplement (https://acs.figshare.com/ndownloader/files/24198285)
Supplement: Supplementary file 1 [file 24198285]

Supporting Information

## **Dual Roles of Polymeric Capping Ligands in the Surface-Protected Etching of Colloidal Silica**

Ji Feng,<sup>‡,a</sup> Fan Yang,<sup>‡,a</sup> Guoxiang Hu,<sup>a,b</sup> Tatiana V. Brinzari,<sup>c</sup> Zuyang Ye,<sup>a</sup> Jinxing Chen,<sup>a</sup> Saide Tang,<sup>c</sup>

Shiyou Xu,<sup>c</sup> Viktor Dubovoy,<sup>c</sup> Long Pan,<sup>\*c</sup> and Yadong Yin<sup>\*a</sup>

<sup>a</sup> Department of Chemistry, University of California Riverside, California 92521 USA.

<sup>b</sup> Center for Nanophase Materials Sciences, Oak Ridge National Laboratory, Oak Ridge, Tennessee 37831, USA.

<sup>c</sup> Colgate-Palmolive Company, Piscataway, New Jersey 08854, USA

\* Correspondence should be addressed to [long\\_pan@colpal.com](mailto:long_pan@colpal.com) (Pan) and [yadong.yin@ucr.edu](mailto:yadong.yin@ucr.edu) (Yin)

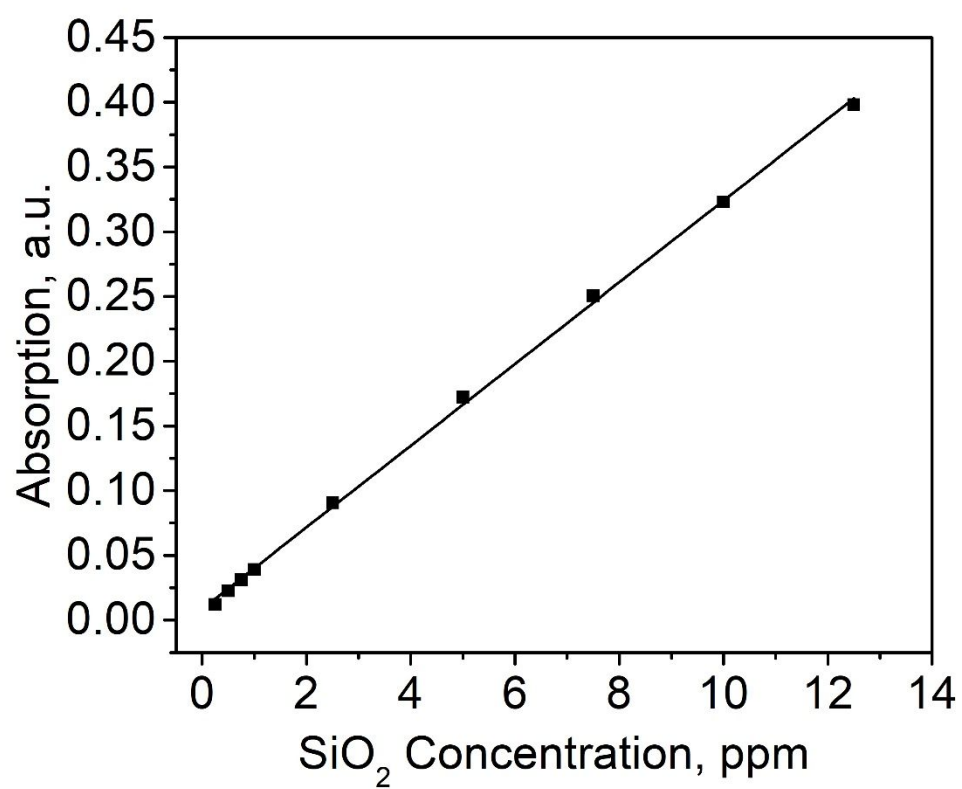

**Figure S1.** Standard calibration curve of SiO<sub>2</sub> concentration.

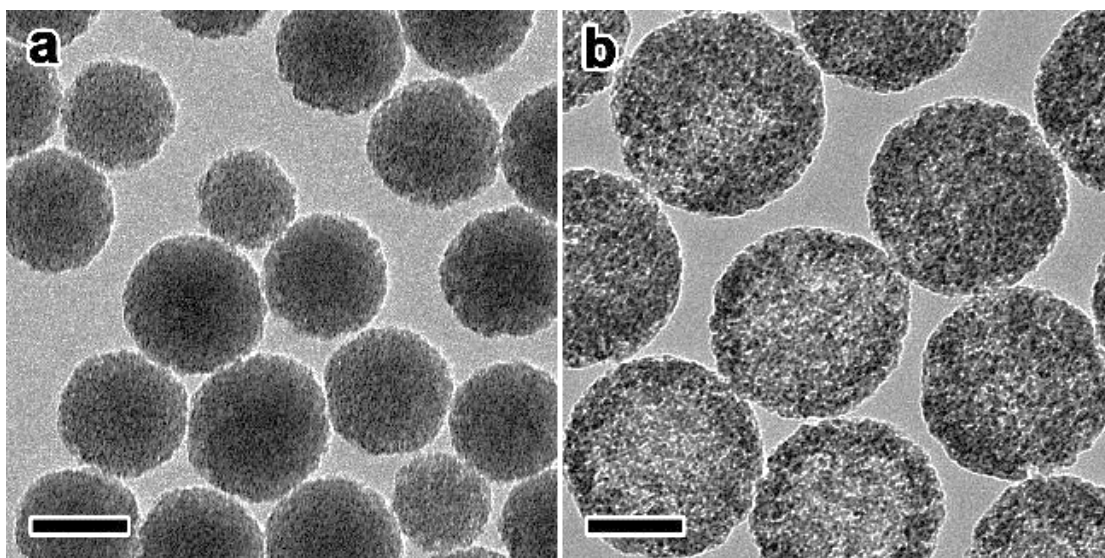

**Figure S2.** TEM images of (a) as-synthesized Stöber silica nanospheres and (b) PVP-capped silica nanospheres after being etched in 0.33 M NaOH for 5 hrs. The scale bars represent 100 nm.

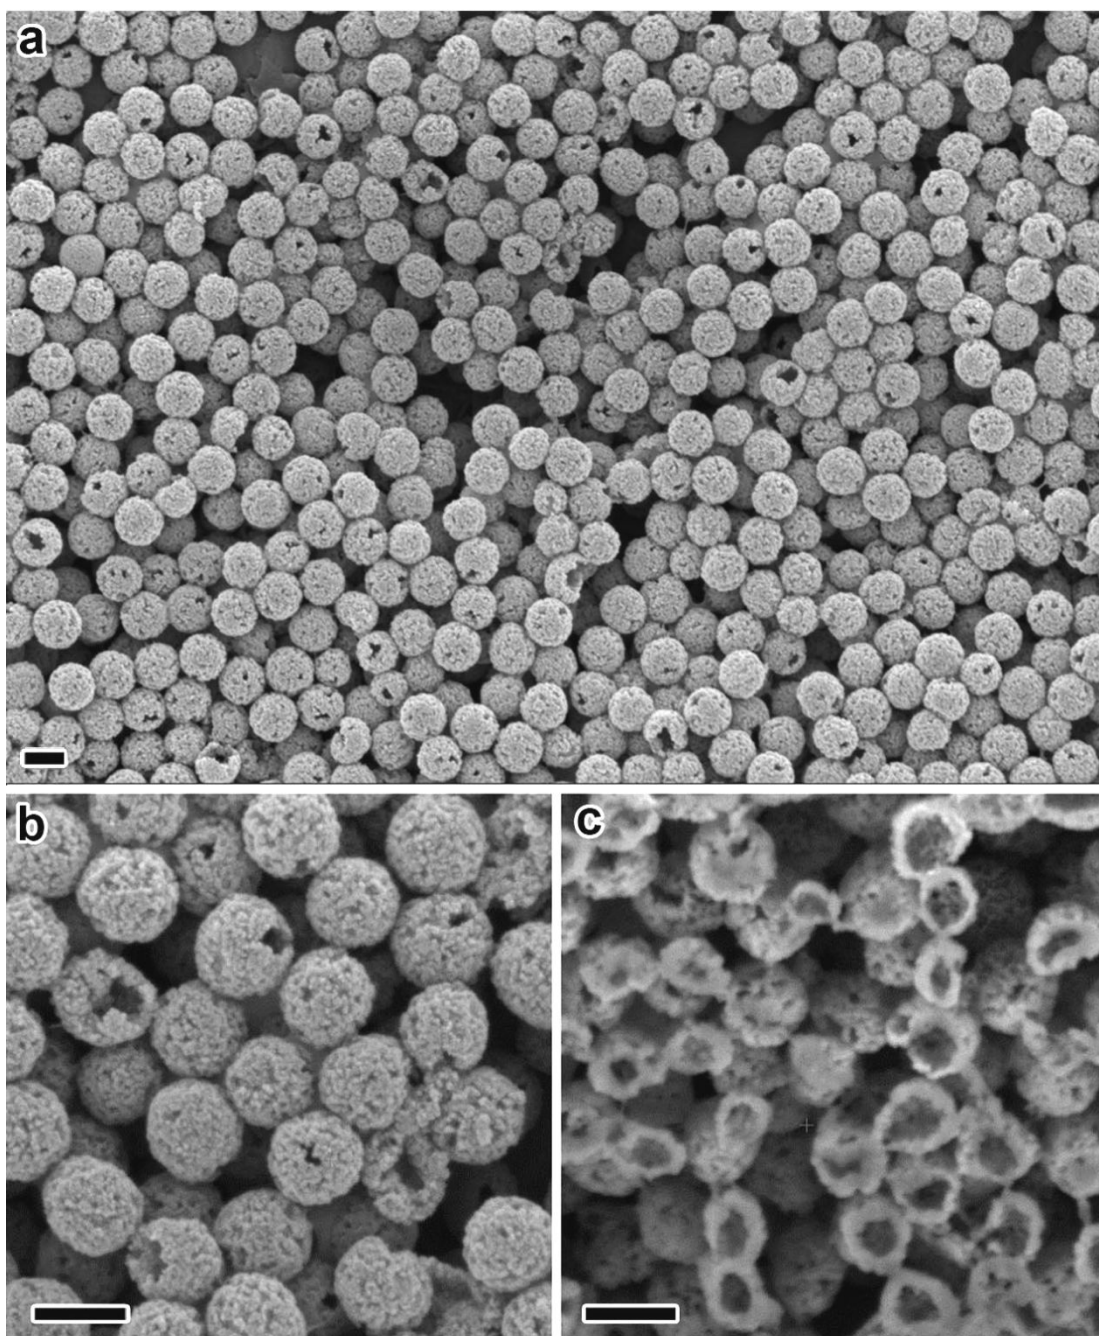

**Figure S3.** (a, b) SEM images of PVP-capped silica nanospheres being etched in 0.33 M NaOH for 5 hrs. (c) SEM image of the same sample after ablated by FIB. The scale bars are 200 nm in (a) and 100 nm in (b,c).

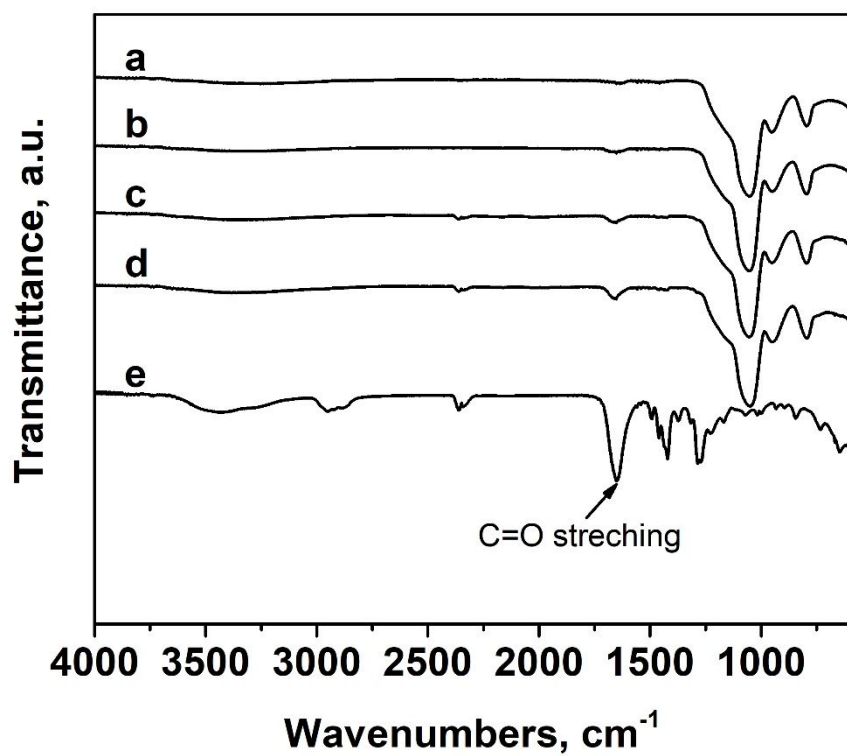

**Figure S4.** FTIR spectra of (a-d) SiO<sub>2</sub> nanospheres being heated at 100 °C for 3 h with different molar ratio of PVP/Si and (e) pure PVP. The molar ratio of PVP/Si are (a) 0, (b) 1, (c) 5 and (d) 10.

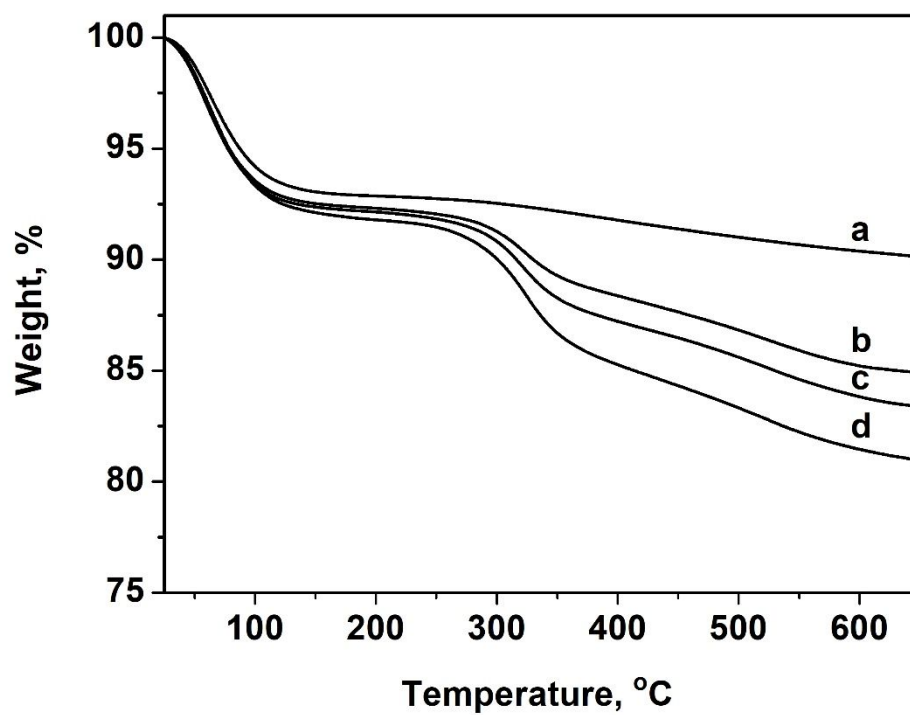

**Figure S5.** TGA curves of SiO<sub>2</sub> nanospheres being heated at 100 °C for 3 h with different molar ratio of PVP/Si: (a) 0, (b) 1, (c) 5 and (d) 10.

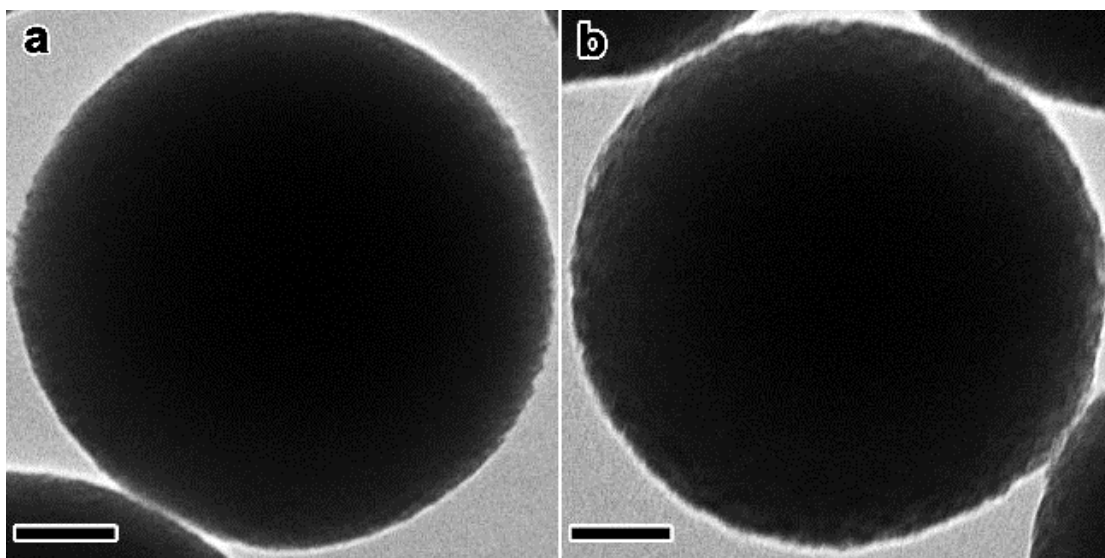

**Figure S6.** TEM images of silica nanospheres being heated at 100 °C (a) with PVP and (b) without PVP. The scale bars represent 50 nm.

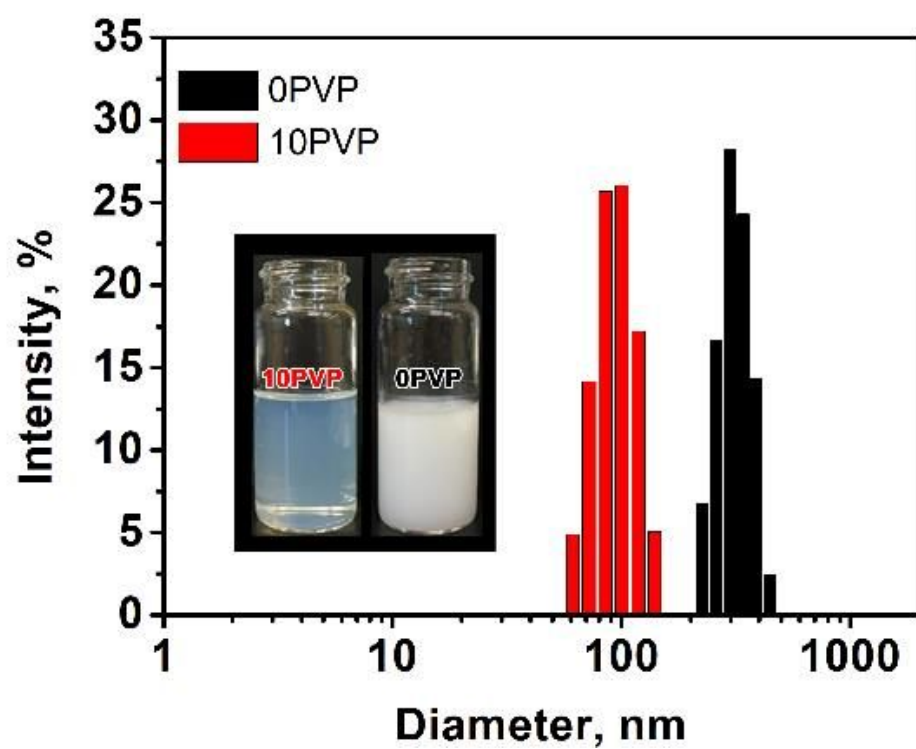

**Figure S7.** Size distribution of silica nanospheres synthesized with and without PVP. The inset digital image shows the appearance of the nanospheres after synthesis.
